# Supplementary material for: Epitaxy growth of MAPbBrxCl3−x single-crystalline perovskite films toward spectral selective detection in both broadband and narrowband ranges
Source: Royal Society of Chemistry journal article supplement (doi:10.1039/d3tc02300a), 2023-01-01
Supplement: d3tc02300a1.pdf [file d3tc02300a1.pdf]

## Supplementary Information

*For*

**Epitaxy growth of MAPbBr<sub>x</sub>Cl<sub>3-x</sub> single-crystalline perovskite films toward spectral selective detection in both broadband and narrowband range**

***Yuzhu Pan<sup>1</sup>, Xin Wang<sup>1\*</sup>, Yubing Xu<sup>1</sup>, Shunjie Chai<sup>1</sup>, Jie Wu<sup>1</sup>, Zhiwei Zhao<sup>1</sup>, Qing Li<sup>1</sup>, Jun Wu<sup>1</sup>, Jing Chen<sup>1</sup>, Zhuoya Zhu<sup>1</sup>, Byung Seong Bae<sup>2</sup>, Omolola Esther Fayemi<sup>3</sup>, Jianming Zhou<sup>4</sup>, Ying Zhu<sup>5</sup>, and Wei Lei<sup>1\*</sup>***

<sup>1</sup>*School of Electronic Science and Engineering, Joint International Research Laboratory of Information Display and Visualization, Southeast University, Nanjing, China*

<sup>2</sup>*Department of Electronics & Display Engineering Hoseo University, Hoseo Ro 79, Asan city, Chungnam 31499, Republic of Korea*

<sup>3</sup>*Department of Chemistry, School of Mathematics and Physical Sciences Faculty of Natural and Agricultural Sciences North-West University, Mafikeng Campus, Private Bag X2046, Mmabatho 2735, South Africa*

<sup>4</sup>*E-spectrum Optoelectronic Co. Ltd., Suzhou 215111, China*

<sup>5</sup>*E-xray Electronic Co. Ltd., Suzhou 215131, China*

**\* Correspondence:**

Wei Lei

[lw@seu.edu.cn](mailto:lw@seu.edu.cn)

Xin Wang

[xinw@seu.edu.cn](mailto:xinw@seu.edu.cn)

***Keywords: epitaxial growth, mixed-halide perovskite, photoelectric characteristics, tunable spectral response, dual-mode detection***

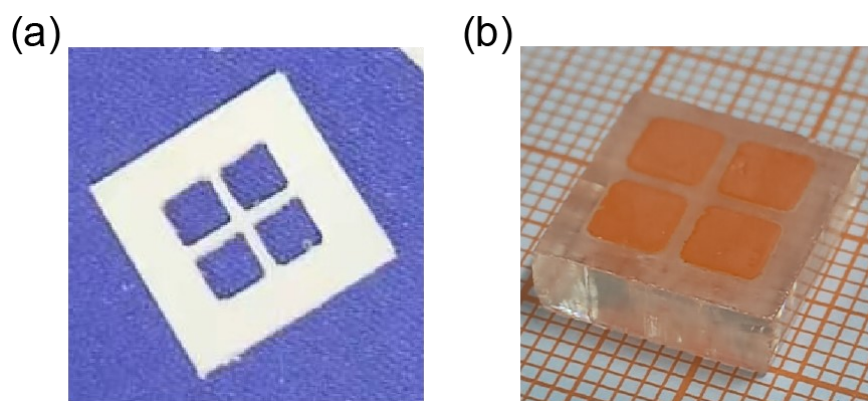

**Figure S1** (a) Photograph of the used Teflon mould with a square of  $15 \times 15 \text{ mm}^2$  and thickness of 1 mm. (b) Photograph of the epitaxial  $2 \times 2$  MAPbBr<sub>3</sub> single-crystalline arrays on MAPbCl<sub>3</sub> crystals with single pixel area of  $4 \times 4 \text{ mm}^2$ .

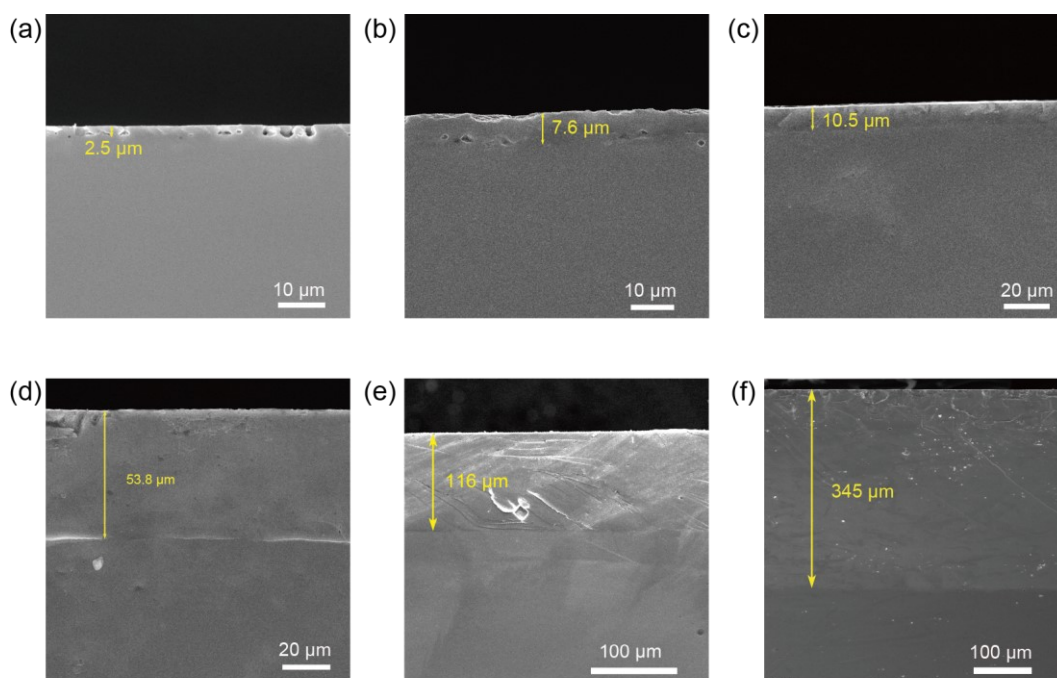

**Figure S2** Cross-sectional SEM images of the formed heterojunction interfaces with the duration of MAPbCl<sub>3</sub> crystals dipping into hot MAPbBr<sub>3</sub> solution as (a) 20 seconds, (b) 50 seconds, (c) 2 minutes, (d) 10 minutes, (e) 1 hours to (f) 4 hours, respectively.

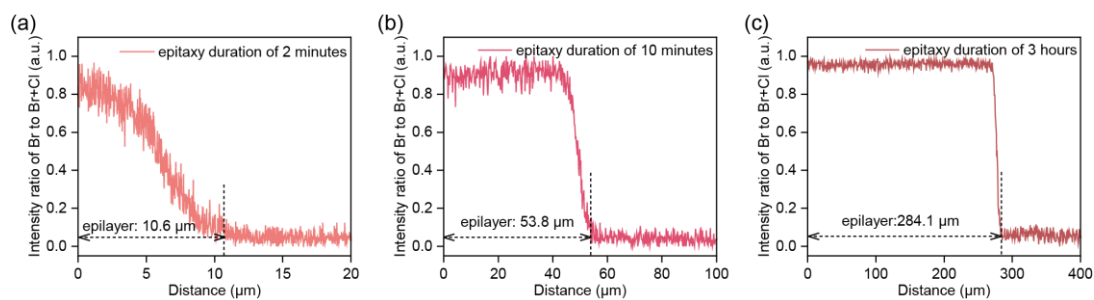

**Figure S3** EDX line scanning results images of the Br/(Br+Cl) atom intensity ratio across the epitaxial interface of formed heterojunctions with the duration of MAPbCl<sub>3</sub> crystals dipping into hot MAPbBr<sub>3</sub> solution as (a) 2 minutes, (b) 10 minutes, and (c) 3 hours, respectively.

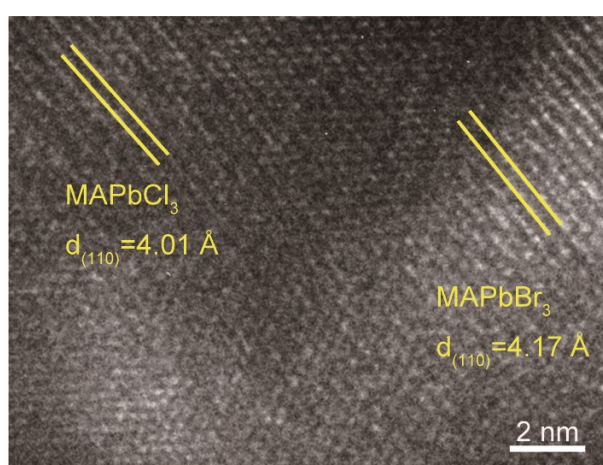

**Figure S4** HRTEM image of the interface region of Bi-MAPbCl<sub>3</sub>/MAPbBr<sub>3</sub> single-crystalline heterojunction.

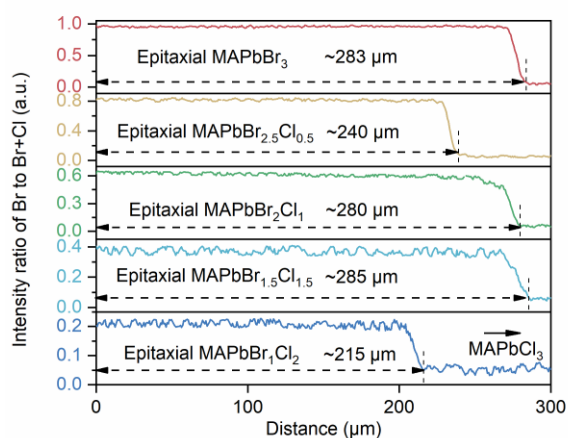

**Figure S5** EDX line scanning results images of the Br/(Br+Cl) atom intensity ratio from epitaxial MAPbBr<sub>x</sub>Cl<sub>3-x</sub> surface to the MAPbCl<sub>3</sub> substrate.

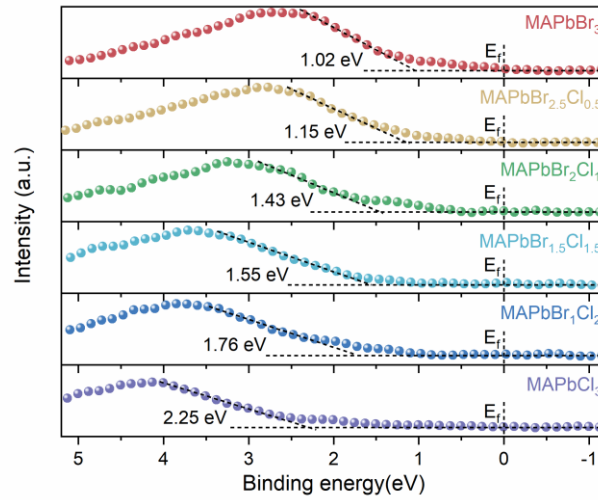

**Figure S6** XPS valence spectra of fabricated single-crystalline  $\text{MAPbBr}_x\text{Cl}_{3-x}$  samples with  $x=0, 1, 1.5, 2, 2.5, 3$ , respectively.

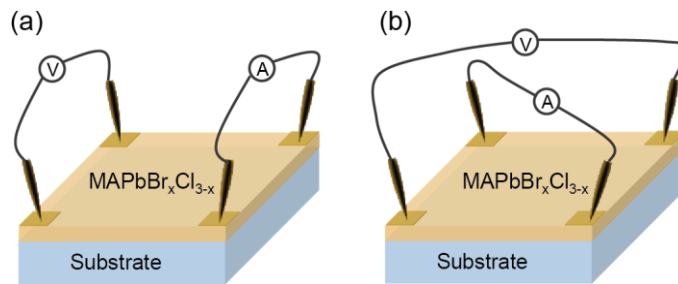

**Figure S7** Schematic diagram of (a) sheet resistivity measurement and (b) hall effect measurement for the epitaxial  $\text{MAPbBr}_x\text{Cl}_{3-x}$  single-crystalline layers by four contacts van der Pauw method.

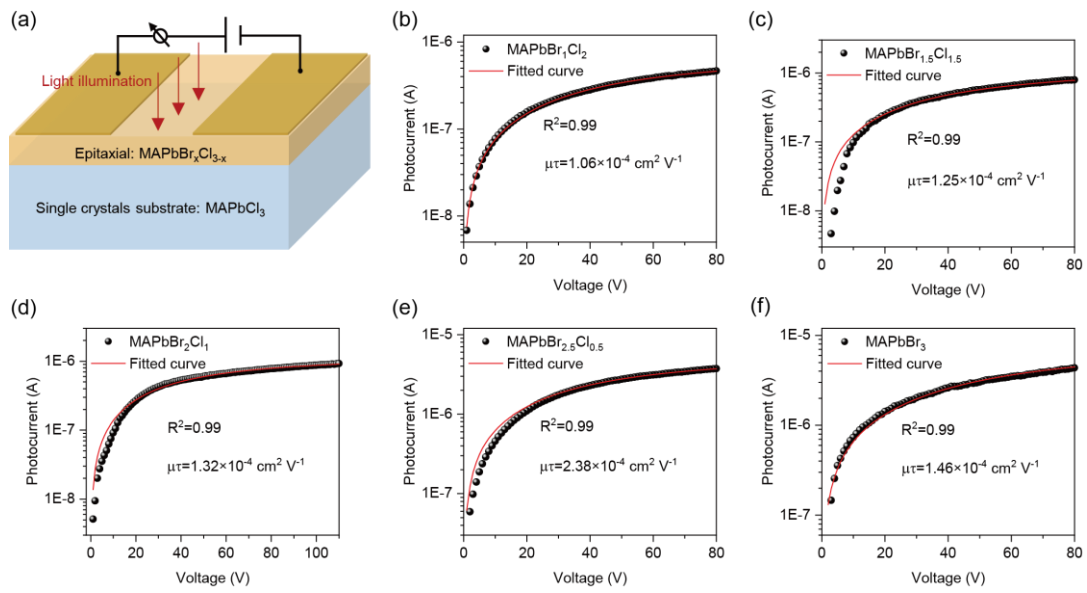

**Figure S8** (a) Schematic diagram of the voltage-dependent photocurrent measurement for the epitaxial MAPbBr<sub>x</sub>Cl<sub>3-x</sub> single-crystalline planar-type devices. (b-f) The results of voltage-dependent photocurrent for different epitaxial MAPbBr<sub>x</sub>Cl<sub>3-x</sub> layers. The red solid line represents a mobility-lifetime fitting to the data according to the Hecht equation.

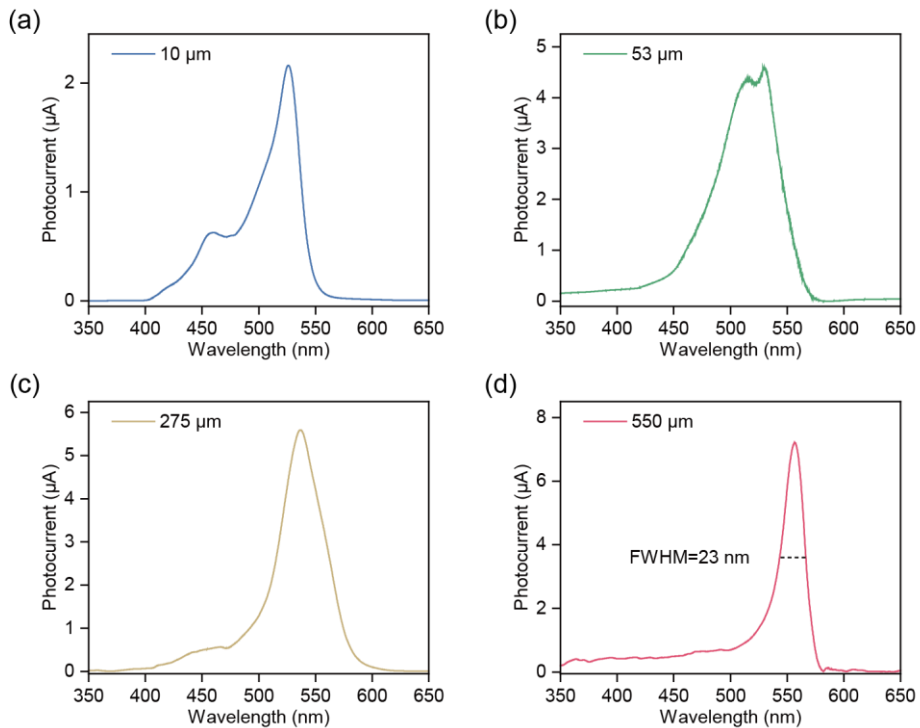

**Figure S9** Photo response spectra of the epitaxial planar-type MAPbBr<sub>3</sub> photodetectors with different thickness upon bottom illumination at an external electric field of 30 V mm<sup>-1</sup>.

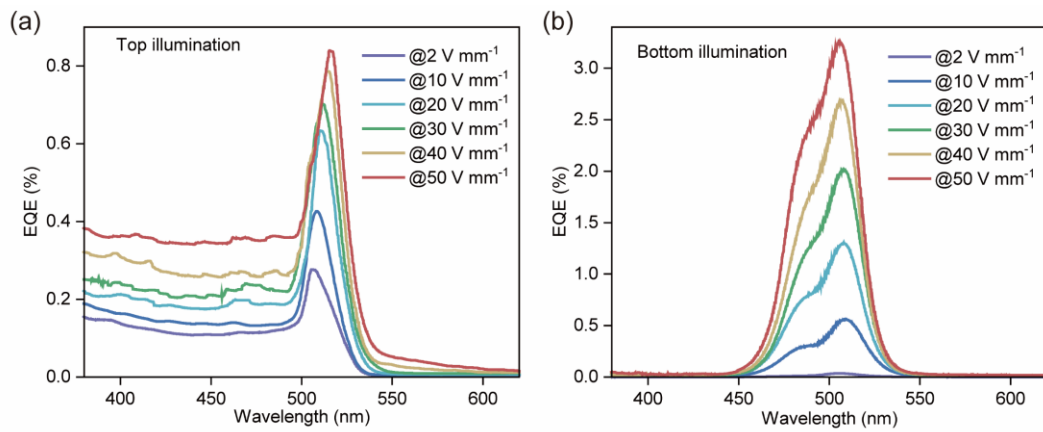

**Figure S10** EQE spectra of the planar-type  $\text{MAPbBr}_{2.5}\text{Cl}_{0.5}$  photodetector under various external electric field upon (a) top illumination and (b) bottom illumination.

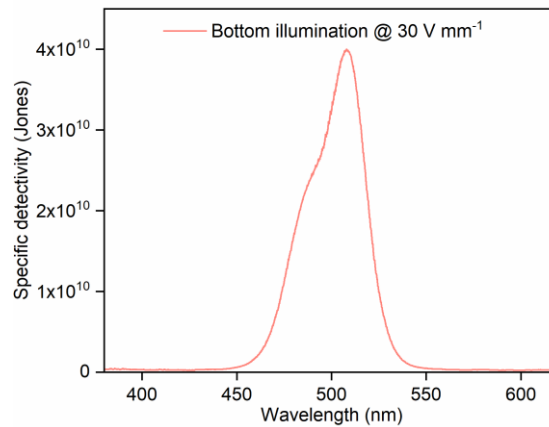

**Figure S11** Specific detectivity ( $D^*$ ) of the planar-type  $\text{MAPbBr}_{2.5}\text{Cl}_{0.5}$  photodetector under  $30 \text{ V mm}^{-1}$  upon bottom illumination.

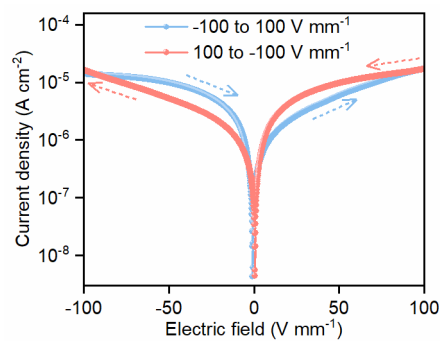

**Figure S12** Current density-Electric field hysteresis loop for the epitaxial  $\text{MAPbBr}_{2.5}\text{Cl}_{0.5}$  planar-type device in darkness.

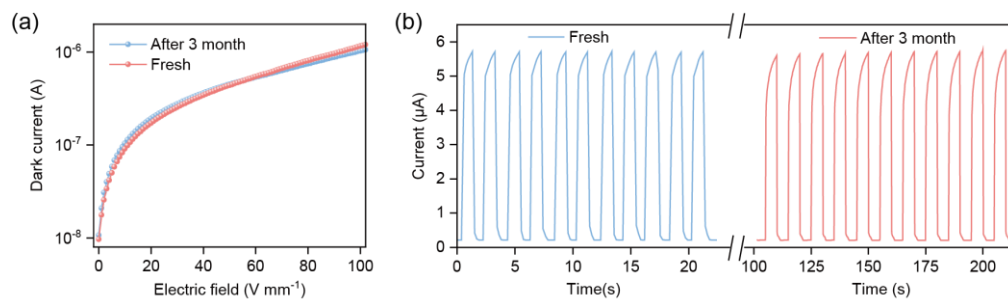

**Figure S13** Long-time stability of the epitaxial MAPbBr<sub>2.5</sub>Cl<sub>0.5</sub> photodetector: (a) I-V stability in darkness and (b) photo response stability after 3 month in air condition without any encapsulation.

**Table S1** The key optoelectronic parameters of MAPbBr<sub>x</sub>Cl<sub>3-x</sub> perovskite crystals and films reported in literatures.

| <b>Material</b>                           | <b>Morphology</b>              | <b>Mobility<br/>(cm<sup>2</sup> V<sup>-1</sup> s<sup>-1</sup>)</b> | <b>Carrier<br/>lifetime<br/>(ns)</b> | <b>Diffusion<br/>length (μm)</b> | <b>Ref.</b>      |
|-------------------------------------------|--------------------------------|--------------------------------------------------------------------|--------------------------------------|----------------------------------|------------------|
| <b>MAPbBr<sub>x</sub>Cl<sub>3-x</sub></b> | <b>single-crystalline film</b> | <b>110~213</b>                                                     | <b>620~1360</b>                      | <b>16.6~24.8</b>                 | <b>This work</b> |
| MAPbCl <sub>3</sub>                       | single-crystal                 | 42 ± 9                                                             | 662                                  | 3.0–8.5                          | 1                |
| MAPbCl <sub>3</sub>                       | single-crystal                 | 26                                                                 | 31                                   | NA                               | 2                |
| MAPbCl <sub>3</sub>                       | Polycrystalline film           | NA                                                                 | 6                                    | NA                               | 2                |
| MAPbBr <sub>3</sub>                       | single-crystal                 | 81 ± 5                                                             | 899 ± 127                            | 5.4–14.2                         | 3                |
| MAPbBr <sub>3</sub>                       | single-crystalline film        | 60                                                                 | 10–60                                | 1.5–3                            | 4                |
| MAPbBr <sub>2.94</sub> Cl <sub>0.06</sub> | single-crystal                 | 560                                                                | 5000                                 | NA                               | 5                |
| MAPbBr <sub>3</sub>                       | single-crystalline film        | 60                                                                 | 189±10                               | 5                                | 6                |
| MAPbBr <sub>3</sub>                       | single-crystalline film        | 261.94                                                             | 60.26                                | NA                               | 7                |
| MAPbBr <sub>3</sub>                       | single-crystalline film        | 40.7(e); 27.3(h)                                                   | 390                                  | 6.4(e); 5.2(h)                   | 8                |
| MAPbBr <sub>3</sub>                       | Polycrystalline film           | 0.26                                                               | 168                                  | 0.33                             | 6                |
| MAPbBr <sub>3</sub>                       | Polycrystalline film           | 8.6(e); 9.0(h)                                                     | 51                                   | 1.058 ± 0.048                    | 9                |

## Reference

1. G. Maculan, A. D. Sheikh, A. L. Abdelhady, M. I. Saidaminov, M. A. Haque, B. Murali, E. Alarousu, O. F. Mohammed, T. Wu and O. M. Bakr, *J Phys Chem Lett*, 2015, **6**, 3781-3786.
2. V. Adinolfi, O. Ouellette, M. I. Saidaminov, G. Walters, A. L. Abdelhady, O. M. Bakr and E. H. Sargent, *Adv Mater*, 2016, **28**, 7264-7268.
3. Y. Liu, Y. Zhang, K. Zhao, Z. Yang, J. Feng, X. Zhang, K. Wang, L. Meng, H. Ye, M. Liu and S. F. Liu, *Advanced Materials*, 2018, **30**.
4. Z. Yang, Y. Deng, X. Zhang, S. Wang, H. Chen, S. Yang, J. Khurgin, N. X. Fang, X. Zhang and R. Ma, *Adv Mater*, 2018, **30**.
5. H. Wei, D. DeSantis, W. Wei, Y. Deng, D. Guo, T. J. Savenije, L. Cao and J. Huang, *Nat Mater*, 2017, **16**, 826-833.
6. M. I. Saidaminov, V. Adinolfi, R. Comin, A. L. Abdelhady, W. Peng, I. Dursun, M. Yuan, S. Hoogland, E. H. Sargent and O. M. Bakr, *Nat Commun*, 2015, **6**, 8724.
7. L. Zhang, L. Liu, P. Zhang, R. Li, G. Zhang and X. Tao, *ACS Appl Mater Interfaces*, 2020, **12**, 39834-39840.
8. H. S. Rao, W. G. Li, B. X. Chen, D. B. Kuang and C. Y. Su, *Adv Mater*, 2017, **29**.
9. R. Sheng, A. Ho-Baillie, S. Huang, S. Chen, X. Wen, X. Hao and M. A. Green, *The Journal of Physical Chemistry C*, 2015, **119**, 3545-3549.
